# Supplementary material for: Assessing Public Opinion on CRISPR-Cas9: Combining Crowdsourcing and Deep Learning
Source: PubMed Central journal article supplement (PMC7490675; doi:10.2196/17830), 2020-08-31
Supplement: jmir_v22i8e17830_app4.pdf [file jmir_v22i8e17830_app4.pdf]

## Multimedia Appendix 4

| Theme        | Regular expression                        |
|--------------|-------------------------------------------|
| disease      | diseases?                                 |
| health       | restore                                   |
| therapy      | therapy therapeutic                       |
| germline     | germline heritable stem[\s-]cell heritage |
| somatic      | somatic                                   |
| enhancement  | enhanc(e ement ing)                       |
| improvement  | improv(e ement ing)                       |
| treatment    | treat(ment ing)?                          |
| reducing     | (lower(ing)? reduc(e ing))\s.*risk        |
| prevention   | prevent(ion ing)?                         |
| risk         | risks?                                    |
| cure         | cur(e ing)                                |
| progress     | scientific progress                       |
| traits       | traits?                                   |
| abilities    | abilit(y ies)                             |
| intelligence | intelligence                              |
| appearance   | appearance                                |
| price        | expensive                                 |
| discovery    | discovery? anticipat(e ion)               |
| privacy      | privacy                                   |
| accuracy     | accuracy                                  |
| reliability  | reliability                               |
| mutation     | mutations?                                |
| eugenic      | eugenic                                   |
| trust        | trust                                     |
| children     | child(ren)?                               |
| genome       | genome genomics? genes? genetic           |
| embryo       | embryo(nic)?                              |
| baby         | bab(y ies)                                |

**Table : Themes and regex patterns.** Derived themes and corresponding regex patterns from preliminary literature review.
