# Supplementary material for: Assessing Public Opinion on CRISPR-Cas9: Combining Crowdsourcing and Deep Learning
Source: PubMed Central journal article supplement (PMC7490675; doi:10.2196/17830), 2020-08-31
Supplement: jmir_v22i8e17830_app6.pdf [file jmir_v22i8e17830_app6.pdf]

## Multimedia Appendix 6

| # | Mark | Peak time  | Event time | Event                                                                 | Prominence |
|---|------|------------|------------|-----------------------------------------------------------------------|------------|
| 1 |      | 2015-12-03 | 2015-12-01 | First summit on human gene editing in Washington D.C.                 | 0.21       |
| 2 |      | 2016-06-24 | 2016-06-22 | U.S. proposal for human trials passes safety reviews                  | 0.26       |
| 3 | a    | 2016-11-18 | 2016-11-15 | First time use of CRISPR on humans in China                           | 0.34       |
| 4 | b    | 2017-02-17 | 2017-02-15 | Broad Institute prevails in patent conflict                           | 0.33       |
| 5 | c    | 2017-08-04 | 2017-08-02 | CRISPR successfully fixes a gene in viable human embryos              | 0.44       |
| 6 |      | 2018-01-21 | 2018-01-19 | Study on advances in CRISPR technology                                | 0.37       |
| 7 | d    | 2018-07-19 | 2018-07-16 | Study shows the potential for side effects (e.g. deletions) of CRISPR | 0.29       |
| 8 | e    | 2018-11-29 | 2018-11-26 | "CRISPR babies" scandal                                               | 0.97       |
| 9 | f    | 2019-02-04 | 2017-08-10 | Biohackers encode a malware program into DNA                          | 0.29       |

**Table : Identified events.** Selected events with a peak prominence above 0.2. The marks correspond to the selected events in Figure 2 of the article. Peak times have been automatically detected as described in the methods section. The corresponding events have been inferred from visual inspection of the data.
