# Supplementary material for: Assessing Public Opinion on CRISPR-Cas9: Combining Crowdsourcing and Deep Learning
Source: PubMed Central journal article supplement (PMC7490675; doi:10.2196/17830), 2020-08-31
Supplement: jmir_v22i8e17830_app8.pdf [file jmir_v22i8e17830_app8.pdf]

## Multimedia Appendix 8

| Year        | Hashtag        | Count | Sent  | SD           | Year  | Hashtag           | Count  | Sent  | SD   |
|-------------|----------------|-------|-------|--------------|-------|-------------------|--------|-------|------|
| 2013        | genome         | 94    | 0.81  | 0.40         | 2017  | geneediting       | 12,648 | 0.38  | 0.56 |
|             | dna            | 48    | 0.92  | 0.35         |       | genomeediting     | 9747   | 0.36  | 0.55 |
|             | cas9           | 44    | 0.32  | 0.47         |       | science           | 5190   | 0.60  | 0.56 |
|             | drosophila     | 41    | 0.41  | 0.50         |       | biotech           | 3374   | 0.53  | 0.57 |
|             | crisp          | 38    | 1.00  | 0.00         |       | tech              | 3322   | 0.63  | 0.53 |
|             | genetics       | 38    | 0.82  | 0.39         |       | dna               | 2894   | 0.56  | 0.57 |
|             | synbio         | 38    | 0.42  | 0.64         |       | genetics          | 2546   | 0.54  | 0.59 |
|             | btoty          | 34    | 1.00  | 0.00         |       | genomics          | 2294   | 0.51  | 0.57 |
|             | science        | 31    | 0.74  | 0.44         |       | cancer            | 2003   | 0.68  | 0.55 |
|             | rna            | 30    | 0.47  | 0.51         |       | health            | 1883   | 0.79  | 0.49 |
|             | editas         | 28    | 0.96  | 0.19         |       | news              | 1804   | 0.62  | 0.55 |
|             | genomics       | 28    | 0.43  | 0.50         |       | ai                | 1743   | 0.47  | 0.53 |
|             | gblocks        | 23    | 0.00  | 0.00         |       | technology        | 1679   | 0.58  | 0.56 |
| cell        | 22             | 0.82  | 0.39  | sntop10      | 1533  | 0.25              | 0.64   |       |      |
| biotech     | 20             | 0.50  | 0.51  | gmo          | 1504  | 0.14              | 0.75   |       |      |
| 2014        | genomics       | 368   | 0.80  | 0.40         | 2018  | geneediting       | 13,000 | 0.37  | 0.63 |
|             | dna            | 273   | 0.63  | 0.48         |       | genomeediting     | 7765   | 0.40  | 0.58 |
|             | synbio         | 244   | 0.68  | 0.47         |       | science           | 5210   | 0.52  | 0.64 |
|             | cas9           | 225   | 0.60  | 0.49         |       | biotech           | 5052   | 0.41  | 0.60 |
|             | science        | 222   | 0.71  | 0.46         |       | genetics          | 4468   | 0.52  | 0.58 |
|             | genome         | 195   | 0.77  | 0.42         |       | dna               | 4206   | 0.49  | 0.63 |
|             | biotech        | 177   | 0.64  | 0.48         |       | crisprbabies      | 4020   | -0.30 | 0.65 |
|             | genetics       | 175   | 0.73  | 0.45         |       | gmo               | 3886   | 0.09  | 0.61 |
|             | nbthighlight   | 165   | 0.35  | 0.48         |       | cancer            | 3547   | 0.57  | 0.72 |
|             | sciwrri14      | 118   | 0.29  | 0.45         |       | ai                | 3421   | 0.63  | 0.51 |
|             | ashg14         | 115   | 0.39  | 0.49         |       | genomics          | 3272   | 0.43  | 0.60 |
|             | rna            | 110   | 0.53  | 0.50         |       | geneeditsummit    | 2504   | -0.01 | 0.46 |
|             | nbtinthenews   | 91    | 0.92  | 0.27         |       | synbio            | 2289   | 0.58  | 0.58 |
| genetherapy | 90             | 0.54  | 0.50  | gmos         | 2139  | 0.03              | 0.51   |       |      |
| drosophila  | 86             | 0.36  | 0.48  | cas9         | 2009  | 0.45              | 0.65   |       |      |
| 2015        | geneeditsummit | 3337  | 0.20  | 0.44         | 2019* | geneediting       | 10,764 | 0.42  | 0.62 |
|             | science        | 2096  | 0.56  | 0.58         |       | genomeediting     | 5950   | 0.40  | 0.57 |
|             | crisprfacts    | 1322  | 0.36  | 0.59         |       | biotech           | 4778   | 0.55  | 0.53 |
|             | dna            | 1148  | 0.33  | 0.73         |       | science           | 4097   | 0.57  | 0.59 |
|             | geneediting    | 1088  | 0.34  | 0.54         |       | dna               | 3734   | 0.54  | 0.62 |
|             | genetics       | 1045  | 0.23  | 0.70         |       | genetics          | 3720   | 0.53  | 0.55 |
|             | genomeediting  | 963   | 0.49  | 0.52         |       | technology        | 2657   | 0.68  | 0.53 |
|             | genome         | 962   | 0.55  | 0.59         |       | genomics          | 2590   | 0.48  | 0.55 |
|             | biotech        | 938   | 0.49  | 0.53         |       | cancer            | 2306   | 0.68  | 0.55 |
|             | genomics       | 848   | 0.47  | 0.55         |       | gmo               | 2090   | -0.11 | 0.76 |
|             | bioethics      | 797   | -0.02 | 0.45         |       | cas9              | 1841   | 0.61  | 0.53 |
|             | cas9           | 781   | 0.53  | 0.55         |       | researchhighlight | 1822   | 1.00  | 0.06 |
|             | synbio         | 722   | 0.51  | 0.54         |       | ai                | 1793   | 0.56  | 0.56 |
| gene        | 610            | 0.21  | 0.77  | crisprbabies | 1730  | -0.13             | 0.63   |       |      |
| cancer      | 441            | 0.85  | 0.36  | genetherapy  | 1637  | 0.62              | 0.54   |       |      |
| 2016        | science        | 4479  | 0.62  | 0.52         | 2019  | geneediting       | 4485   | 0.42  | 0.62 |
|             | geneediting    | 3920  | 0.42  | 0.53         |       | genomeediting     | 2479   | 0.40  | 0.57 |
|             | tech           | 2163  | 0.46  | 0.59         |       | biotech           | 1991   | 0.55  | 0.53 |
|             | biotech        | 2132  | 0.45  | 0.55         |       | science           | 1707   | 0.57  | 0.59 |
|             | genetics       | 1748  | 0.47  | 0.53         |       | dna               | 1556   | 0.54  | 0.62 |
|             | cancer         | 1671  | 0.69  | 0.46         |       | genetics          | 1550   | 0.53  | 0.55 |
|             | dna            | 1626  | 0.66  | 0.50         |       | technology        | 1107   | 0.68  | 0.53 |
|             | news           | 1551  | 0.43  | 0.57         |       | genomics          | 1079   | 0.48  | 0.55 |
|             | gmo            | 1518  | 0.24  | 0.57         |       | cancer            | 961    | 0.68  | 0.55 |
|             | genomics       | 1496  | 0.50  | 0.53         |       | gmo               | 871    | -0.11 | 0.76 |
|             | hiv            | 1459  | 0.90  | 0.34         |       | cas9              | 767    | 0.61  | 0.53 |
|             | obesity        | 1172  | 0.47  | 0.58         |       | researchhighlight | 759    | 1.00  | 0.06 |
|             | gene           | 1057  | 0.64  | 0.51         |       | ai                | 747    | 0.56  | 0.56 |
| patent      | 1038           | 0.02  | 0.28  | crisprbabies | 721   | -0.13             | 0.63   |       |      |
| cas9        | 972            | 0.57  | 0.52  | genetherapy  | 682   | 0.62              | 0.54   |       |      |

**Table : Top hashtags' counts and sentiments.** List of top 15 hashtags, corresponding counts (Count), sentiments (Sent) and standard deviations (SD) by year. The extrapolated hashtag counts for 2019 are shown under 2019\*, the original counts for the first five months under 2019. The mean values of this table were used in Figure 4.
