# Supplementary material for: Assessing Public Opinion on CRISPR-Cas9: Combining Crowdsourcing and Deep Learning
Source: PubMed Central journal article supplement (PMC7490675; doi:10.2196/17830), 2020-08-31
Supplement: jmir_v22i8e17830_app9.pdf [file jmir_v22i8e17830_app9.pdf]

## Multimedia Appendix 9

| Sentiment | Year  | genome | baby   | disease | embryo | treatment | mutation |
|-----------|-------|--------|--------|---------|--------|-----------|----------|
| negative  | 2013  | 8      | 0      | 0       | 0      | 0         | 0        |
|           | 2014  | 24     | 0      | 0       | 1      | 0         | 1        |
|           | 2015  | 1407   | 58     | 18      | 418    | 16        | 40       |
|           | 2016  | 1678   | 72     | 149     | 69     | 151       | 58       |
|           | 2017  | 6392   | 137    | 289     | 1092   | 35        | 3647     |
|           | 2018  | 18,340 | 8363   | 484     | 986    | 970       | 1598     |
|           | 2019* | 8431   | 6586   | 425     | 1382   | 154       | 871      |
|           | 2019  | 3513   | 2744   | 177     | 576    | 64        | 363      |
| neutral   | 2013  | 516    | 0      | 10      | 3      | 5         | 45       |
|           | 2014  | 2019   | 7      | 41      | 17     | 15        | 89       |
|           | 2015  | 17,894 | 1376   | 331     | 2798   | 124       | 110      |
|           | 2016  | 36,039 | 575    | 403     | 3579   | 361       | 294      |
|           | 2017  | 40,272 | 3178   | 1111    | 12,293 | 380       | 1353     |
|           | 2018  | 53,096 | 19,705 | 1967    | 6551   | 932       | 2485     |
|           | 2019* | 40,241 | 15,794 | 1572    | 2755   | 785       | 898      |
|           | 2019  | 16,767 | 6581   | 655     | 1148   | 327       | 374      |
| positive  | 2013  | 1176   | 2      | 492     | 7      | 41        | 31       |
|           | 2014  | 4347   | 5      | 429     | 15     | 60        | 349      |
|           | 2015  | 22,036 | 544    | 1402    | 570    | 933       | 469      |
|           | 2016  | 40,402 | 320    | 5748    | 1643   | 5868      | 3019     |
|           | 2017  | 68,733 | 1218   | 15,754  | 10,762 | 6994      | 8510     |
|           | 2018  | 81,303 | 4869   | 17,358  | 2828   | 7757      | 6450     |
|           | 2019* | 82,258 | 5460   | 16,198  | 1315   | 10,284    | 4567     |
|           | 2019  | 34,274 | 2275   | 6749    | 548    | 4285      | 1903     |

**Table : Top themes found in tweets.** List of top 6 themes with highest overall occurrence across sentiment. The table shows the number of occurrences in tweets for every sentiment and year. The year 2019 was extrapolated to determine the top themes, indicated by the star (\*), based on the first five months of 2019. These counts were used in Figure 5.
